# Supplementary material for: Aberrant methylation and silencing of the SPINT2 gene in high‐grade gliomas
Source: PubMed Central journal article supplement — Cancer Sci. 2018 Aug 16;109(9):2970–9. doi: 10.1111/cas.13732 (PMC6125435; doi:10.1111/cas.13732), 2018-08-16
Supplement: CAS-109-2970-s001.pdf [file CAS-109-2970-s001.pdf]

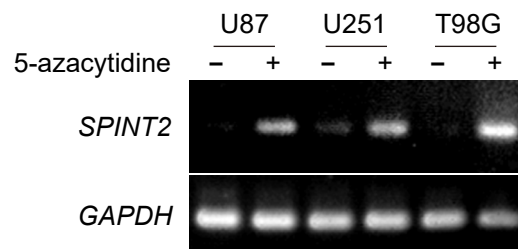

**Fig S1.** Effect of 5-azacytidine on *SPINT2* mRNA expression in glioblastoma cell lines U87, U251 and T98G. Cells were cultured with or without 10  $\mu$ M of 5-azacytidine for 4 days and total RNAs were extracted for RT-PCR.
