# Supplementary material for: Aberrant methylation and silencing of the SPINT2 gene in high‐grade gliomas
Source: PubMed Central journal article supplement — Cancer Sci. 2018 Aug 16;109(9):2970–9. doi: 10.1111/cas.13732 (PMC6125435; doi:10.1111/cas.13732), 2018-08-16
Supplement: CAS-109-2970-s004.pdf [file CAS-109-2970-s004.pdf]

**Tab S2.** Characteristics of the 56 glioma patients and SPINT2 methylation status

| Grade | No. | Age/Sex | Dx  | <i>MGMT</i> | <i>TERT</i> | <i>IDH1</i> | <i>SPINT2</i> | Grade | No | Age/Sex | Dx  | <i>MGMT</i> | <i>TERT</i> | <i>IDH1</i> | <i>SPINT2</i> |
|-------|-----|---------|-----|-------------|-------------|-------------|---------------|-------|----|---------|-----|-------------|-------------|-------------|---------------|
| II    | 1   | 62F     | A   | M           | C250T       | Wild        | <b>U</b>      | IV    | 9  | 48F     | GBM | U           | Wild        | Wild        | <b>M</b>      |
|       | 2   | 10M     | A   | U           | Wild        | Wild        | <b>U</b>      |       | 10 | 64F     | GBM | U           | C228T       | Wild        | <b>M</b>      |
|       | 3   | 62M     | A   | M           | C228T       | R132H       | <b>M</b>      |       | 11 | 80M     | GBM | M           | C228T       | Wild        | <b>M</b>      |
|       | 4   | 44F     | O   | M           | C228T       | R132H       | <b>U</b>      |       | 12 | 61M     | GBM | U           | C228T       | Wild        | <b>M</b>      |
|       | 5   | 79F     | A   | U           | C228T       | Wild        | <b>M</b>      |       | 13 | 63F     | GBM | U           | C228T       | Wild        | <b>M</b>      |
|       | 6   | 71M     | A   | M           | Wild        | Wild        | <b>U</b>      |       | 14 | 72F     | GBM | U           | C228T       | Wild        | <b>M</b>      |
| III   | 1   | 73M     | AA  | U           | Wild        | Wild        | <b>M</b>      |       | 15 | 59M     | GBM | U           | C228T       | Wild        | <b>M</b>      |
|       | 2   | 52M     | AA  | U           | Wild        | Wild        | <b>M</b>      |       | 16 | 34M     | GBM | U           | C250T       | Wild        | <b>U</b>      |
|       | 3   | 58M     | AO  | U           | C228T       | Wild        | <b>M</b>      |       | 17 | 41M     | GBM | M           | Wild        | R132H       | <b>NA</b>     |
|       | 4   | 62M     | AA  | U           | Wild        | Wild        | <b>M</b>      |       | 18 | 73M     | GBM | M           | Wild        | Wild        | <b>M</b>      |
|       | 5   | 32F     | AA  | U           | Wild        | R132H       | <b>M</b>      |       | 19 | 67F     | GBM | U           | C228T       | Wild        | <b>M</b>      |
|       | 6   | 41M     | AO  | M           | C250T       | R132H       | <b>M</b>      |       | 20 | 73M     | GBM | M           | C228T       | Wild        | <b>M</b>      |
|       | 7   | 56F     | AA  | U           | Wild        | Wild        | <b>U</b>      |       | 21 | 74M     | GBM | U           | C228T       | Wild        | <b>M</b>      |
|       | 8   | 56M     | AO  | M           | C228T       | R132H       | <b>M</b>      |       | 22 | 68F     | GBM | U           | C250T       | Wild        | <b>U</b>      |
|       | 9   | 66M     | AO  | M           | C250T       | R132H       | <b>M</b>      |       | 23 | 78F     | GBM | M           | Wild        | Wild        | <b>M</b>      |
|       | 10  | 58F     | AA  | M           | Wild        | Wild        | <b>U</b>      |       | 24 | 71M     | GBM | U           | C228T       | Wild        | <b>M</b>      |
|       | 11  | 40M     | AA  | U           | C250T       | Wild        | <b>U</b>      |       | 25 | 58M     | GBM | U           | Wild        | Wild        | <b>U</b>      |
|       | 12  | 58F     | AA  | U           | C228T       | R132H       | <b>U</b>      |       | 26 | 75F     | GBM | M           | Wild        | Wild        | <b>M</b>      |
|       | 13  | 51M     | AA  | U           | Wild        | Wild        | <b>M</b>      |       | 27 | 64F     | GBM | U           | Wild        | Wild        | <b>M</b>      |
|       | 14  | 33F     | AA  | U           | C228T       | Wild        | <b>M</b>      |       | 28 | 61M     | GBM | U           | Wild        | Wild        | <b>M</b>      |
| IV    | 1   | 57F     | GBM | M           | Wild        | Wild        | <b>M</b>      |       | 29 | 89M     | GBM | M           | C250T       | Wild        | <b>M</b>      |
|       | 2   | 71M     | GBM | U           | C228T       | Wild        | <b>M</b>      |       | 30 | 69F     | GBM | M           | C228T       | Wild        | <b>M</b>      |
|       | 3   | 61M     | GBM | M           | C228T       | Wild        | <b>M</b>      |       | 31 | 76M     | GBM | U           | C228T       | Wild        | <b>M</b>      |
|       | 4   | 71M     | GBM | U           | Wild        | Wild        | <b>U</b>      |       | 32 | 23F     | GBM | M           | Wild        | Wild        | <b>U</b>      |
|       | 5   | 67F     | GBM | U           | C228T       | Wild        | <b>M</b>      |       | 33 | 44M     | GBM | U           | C228T       | Wild        | <b>U</b>      |
|       | 6   | 65F     | GBM | M           | Wild        | Wild        | <b>M</b>      |       | 34 | 33M     | GBM | U           | Wild        | Wild        | <b>U</b>      |
|       | 7   | 40F     | GBM | U           | Wild        | Wild        | <b>U</b>      |       | 35 | 62F     | GBM | U           | Wild        | Wild        | <b>U</b>      |
|       | 8   | 80M     | GBM | M           | Wild        | Wild        | <b>M</b>      |       | 36 | 23F     | DMG | U           | Wild        | Wild        | <b>M</b>      |

A, diffuse astrocytoma; O, oligodendroglioma; AA, anaplastic astrocytoma; AO, anaplastic oligodendroglioma; GBM, glioblastoma; DMG, diffuse midline glioma. U, unmethylated; M, methylated; NA, not applicable
